# Supplementary material for: Clinical Relevance of Novel Polymorphisms in the Dihydropyrimidine Dehydrogenase (DPYD) Gene in Patients with Severe Fluoropyrimidine Toxicity: A Spanish Case-Control Study
Source: MDPI journal article supplement (doi:10.3390/pharmaceutics13122036), 2021-11-29
Supplement: s1 [file s1]

# Supplementary Materials: Clinical Relevance of Novel Polymorphisms in the Dihydropyrimidine Dehydrogenase (DPYD) Gene in Patients with Severe Fluoropyrimidine Toxicity: A Spanish Case-Control Study

Paula Soria-Chacartegui, Gonzalo Villapalos-García, Luis A López-Fernández, Marcos Navares-Gómez, Gina Mejía-Abril and Francisco Abad-Santos and Pablo Zubiaur

**Table S1.** Sequences and size of the forward and reverse primers used for Sanger sequencing of the *DPYD* gene.

| Exon | Forward primer           | Reverse primer             | Size (bp) |
|------|--------------------------|----------------------------|-----------|
| 1    | ACTTGGCTCTCTGGCTGGAGCTT  | AAACTTTCCCGCGTCTCTCACTC    | 234       |
| 2    | TTAGCCAGGTGTGGTAGCGTAC   | TGCCTTACAATGTGTGGAGTG      | 410       |
| 3    | TGAGACTTCTGTGACAGCTGTA   | CCTCAAGGGAAGTCTCTCCAC      | 442       |
| 4    | GGAGTGCCAAAGATGAAACACA   | TGGATTTGCTAAGACAAGCTG      | 362       |
| 4    | TCCTATGTGTCAAATACTCTGCT  | TGGGTATCAACAGAGCACCA       | 444       |
| 6    | AGGAGGCATGACTCTAGAAAGG   | CCATTAAAAGAAATATTCACAGGGCT | 719       |
| 7    | AGAATGTAGATGTCCTCATGCA   | TGCATGACATTTGCTGTTAATC     | 331       |
| 8    | AGCCCTTAATAGAACATGTTCT   | TGAAGGCAGTCATTCTTCTGG      | 374       |
| 9    | TGCTTACAGATGTTTTCTCT     | ACAATGTGCTGCTGAGCTTG       | 324       |
| 10   | TGGAAAACTGCAAGATGCAA     | AGCCCTTGAGTATTGACAAAG      | 312       |
| 11   | TGGTGAAAGAAAAAGCTGCAT    | GTTCTTTTCAATACTTGCCACT     | 548       |
| 12   | TGTGTTGTAACTCCAATATTCGT  | TCAAGCATCCTCCCGCTT         | 621       |
| 13   | TTCGGATGCTGTGTTGAAGT     | AATGTGTAATGATAGGTCTTGTCAA  | 443       |
| 14   | GCTTTTCTTTGTCAAAGGAGAC   | AGCTTCACATTGTGTGGGT        | 409       |
| 15   | TAATTCCAAAGCCCCAAATG     | TTTCTCATGGCAGCTCTTTATTT    | 346       |
| 16   | TCAACGGTGAAAGCCTATTG     | AGCTTCCCTCATTTTCCACT       | 318       |
| 17   | TTTGTCTTGACGTCTCCAG      | AGGATCTTGTGTTCCAGATCA      | 437       |
| 18   | TGAGAAAGTAAAGTTGTGGTAATT | GGGATCATAAAGGGCACAAA       | 423       |
| 19   | TCCAGTGACGCTGTCATCA      | ACAGGACAGGAAATAAACCTCA     | 434       |
| 20   | AGACGGCTACTGATCCATCA     | TCTGAAATAGAAACCAAGGCTGA    | 375       |
| 21   | CCCATTTTCTCTTCTCTGAGC    | ATGCATGCTTGCCAGTGT         | 423       |
| 22   | CTTTCAGAAGACAAACATCTAAGC | CAGAAAATGCTTTCTGCCGTA      | 402       |
| 23   | ACGCTAAAATGGGGACATTG     | ACATAAGACAACCTGGCAGTG      | 517       |
